# Supplementary material
Source: MDPI journal article supplement (https://www.mdpi.com/2077-1312/8/11/940)
Supplement: s1 [file s1]

## Electronic Supplementary material

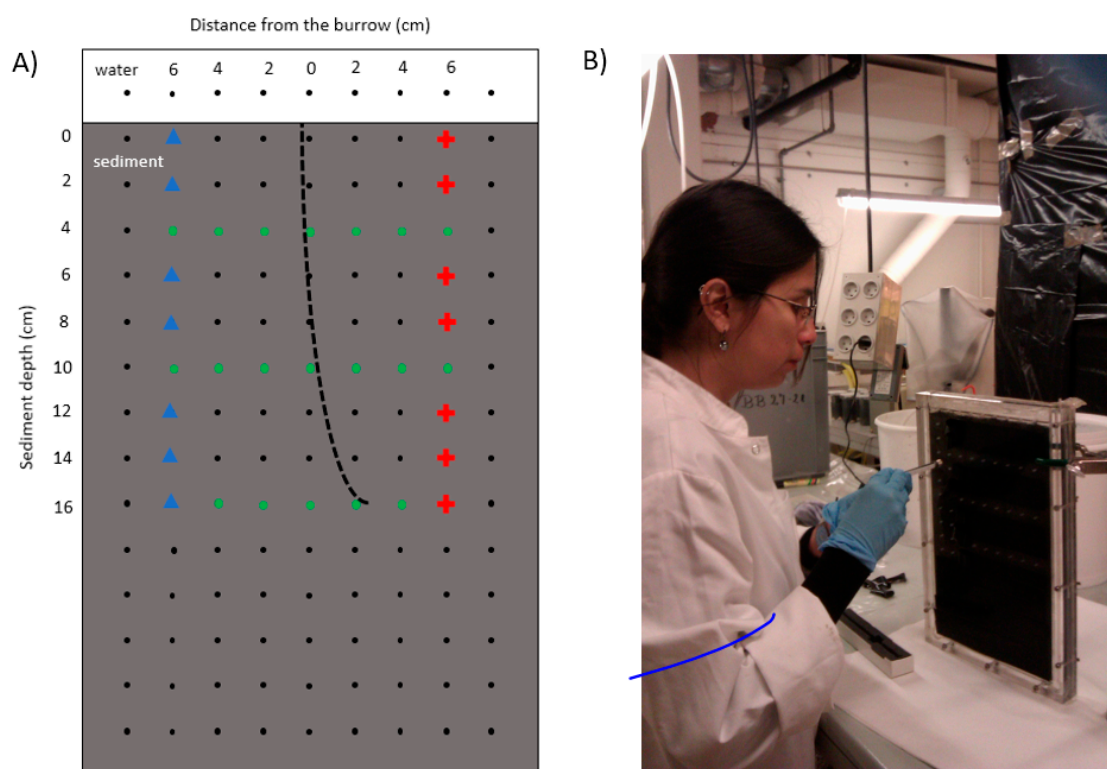

**Figure S1.** Schematic representation of one aquarium illustrating silicon filled injection ports (black circles), horizontal profiles (green circles), vertical profiles for *M. viridis* aquaria (red crosses), vertical profiles for control aquarium (blue triangles and red crosses), and a worm burrow (dashed-line) (A). Injection of  $^{35}\text{S}$  tracer for sulfate reduction incubation, a gas-tight black tape was used to cover the injected ports to avoid oxygen intrusion during incubation (B).
